# Supplementary material for: Enhancement of battery performance of LiMn2O4: correlations between electrochemical and magnetic properties
Source: Royal Society of Chemistry journal article supplement (doi:10.1039/c6ra05032h), 2016-01-01
Supplement: c6ra05032h1.pdf [file c6ra05032h1.pdf]

### Supplementary Information

Enhancement of battery performance of  $\text{LiMn}_2\text{O}_4$ : Correlations between electrochemical and magnetic properties

S. Demirel<sup>a</sup>, E. Oz<sup>a</sup>, S. Altin<sup>a</sup>, A. Bayri<sup>a</sup>, E. Altin<sup>b</sup>, S. Avci<sup>c</sup>

<sup>a</sup> Inonu University, Physics Department, 44280 Malatya, Turkey

<sup>b</sup> Inonu University, Scientific and Technological Research Center, 44280 Malatya, Turkey

<sup>c</sup> Istanbul Medeniyet University, Faculty of Engineering and Naturel Sciences, 34700 Istanbul, Turkey

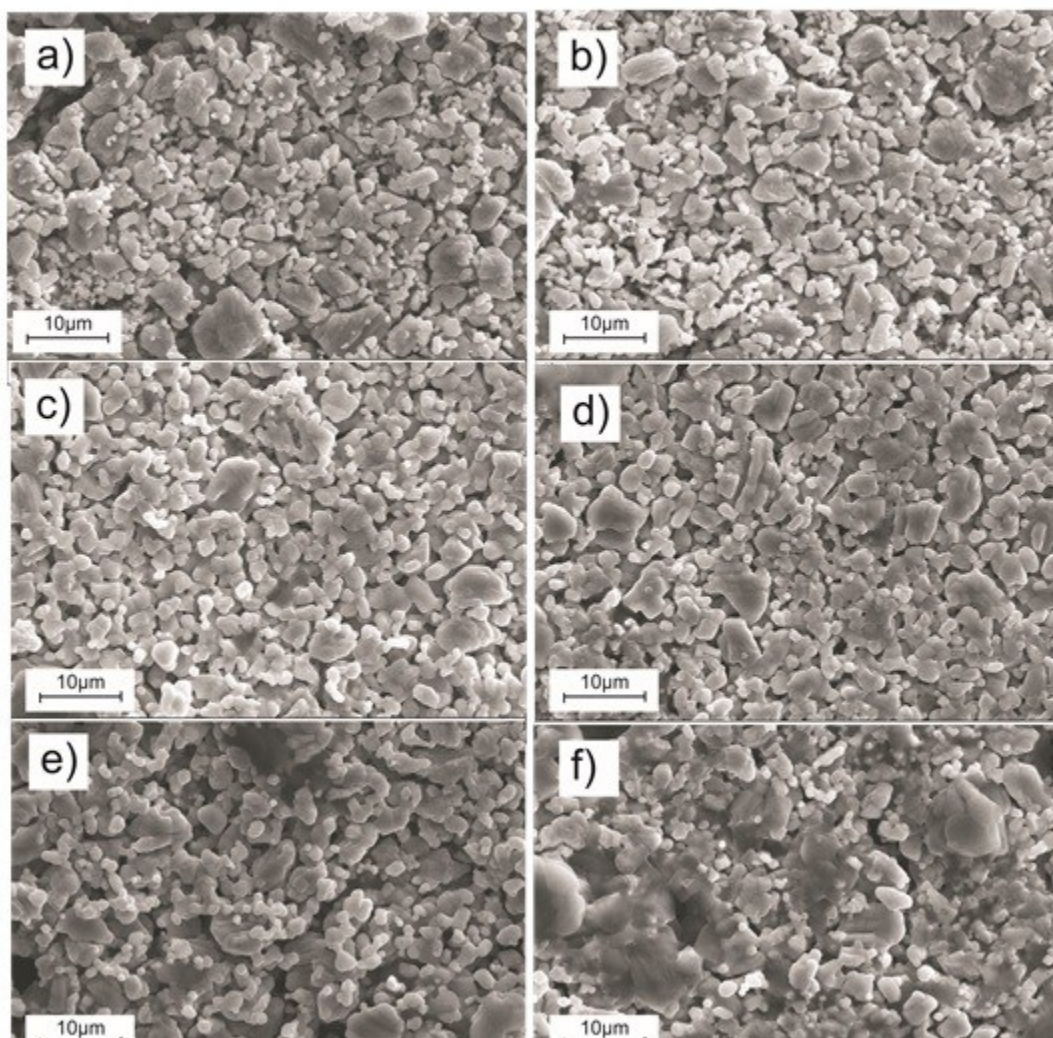

**Fig. S1** SEM image of  $\text{LiMn}_{2-x}\text{B}_x\text{O}_4$  samples where a)  $x=0$ , b)  $x=0.125$ , c)  $x=0.25$ , d)  $x=0.50$ , e)  $x=0.75$  and f)  $x=1$ .

Figure S1 shows the scanning electron microscopy images of  $\text{LiMn}_{2-x}\text{B}_x\text{O}_4$  samples. The images indicate that Boron substitution does not significantly affect the morphology. In  $x=0$  sample there are large and

small grains. The sizes of the grains become more homogenous as the boron content increases for  $x < 0.75$  sample. For  $x = 0.75$  and 1 samples, various sizes of grains appears due to appearance of impurity phases.
